# Supplementary material
Source: PubMed Central journal article supplement (PMC2732303)
Supplement: btp073_1.pdf [file btp073_1.pdf]

## Supplementary material

**Meta-analysis of age-related gene expression profiles identifies common signatures of aging**  
*de Magalhães et al.*

### Contents

#### *In this file*

Figure S1: Flow diagram of our meta-analysis method

Table S1: List of aging microarray datasets used in this work

Table S2: Genes differentially expressed with age that have been validated by direct methods

References for Tables S1 and S2

#### *In accompanying Excel file*

Table S3: List of genes overexpressed with age with  $q < 0.5$

Table S4: List of genes underexpressed with age with  $q < 0.5$

Table S5: List of genes significantly ( $p < 0.05$ ) overexpressed with age using Fisher's inverse Chi-square approach

Table S6: List of genes significantly ( $p < 0.05$ ) underexpressed with age using Fisher's inverse Chi-square approach

Table S7: List of GO categories overrepresented for genes overexpressed with age with  $q < 0.1$

Table S8: List of GO categories overrepresented for genes underexpressed with age with  $q < 0.1$

**Figure S1: Flow diagram of our meta-analysis method**

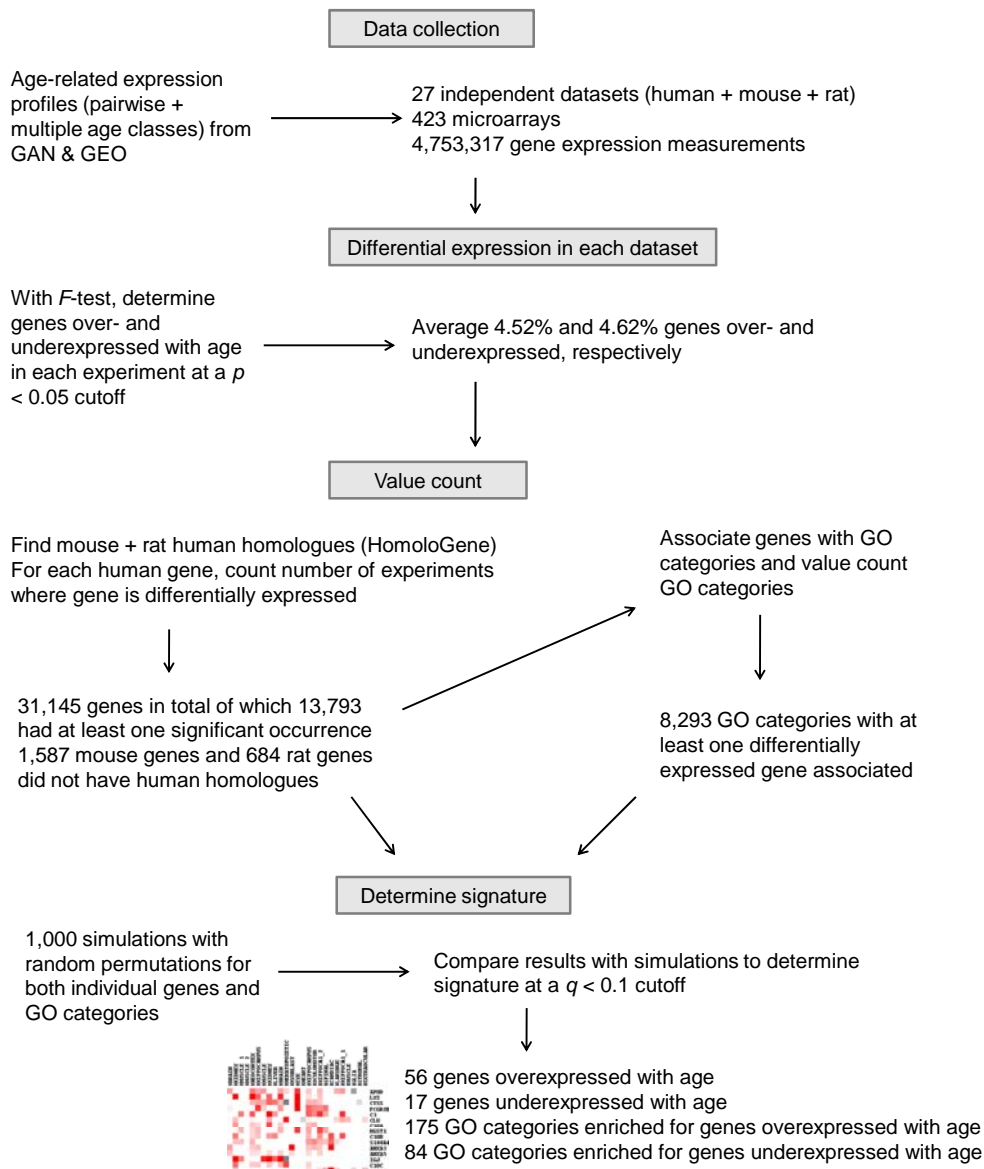

Note: Please see Method section for additional details.

**Table S1: List of aging microarray datasets used in this work**

| <b>Tissue</b>                                  | <b>Ages</b> | <b>GEO</b>                               | <b>Reference</b>                            |
|------------------------------------------------|-------------|------------------------------------------|---------------------------------------------|
| <b>Human (<i>Homo sapiens</i>) datasets</b>    |             |                                          |                                             |
| Brain                                          | 26-106 yrs  | GDS707                                   | Lu, et al., 2004                            |
| Kidney                                         | 27-92 yrs   | NA                                       | Rodwell, et al., 2004                       |
| Skeletal muscle                                | 20-75 yrs   | GDS472, GDS473,<br>GDS287, and<br>GDS288 | Welle, et al., 2004; Welle, et al.,<br>2003 |
| Skeletal muscle                                | 22.5-73 yrs | GDS156                                   | Welle, et al., 2002                         |
| <b>Mouse (<i>Mus musculus</i>) datasets</b>    |             |                                          |                                             |
| Skeletal muscle                                | 5-25 mo     | GDS2612<br>GDS355 and                    | Edwards, et al., 2007<br>NA                 |
| Kidney                                         | 5-30 mo     | GDS356                                   |                                             |
| Brain                                          | 4.5-22 mo   | GDS1311                                  | Godbout, et al., 2005                       |
| Hippocampus                                    | 2-15 mo     | GDS2082                                  | Verbitsky, et al., 2004                     |
| Liver                                          | 6-22 mo     | GDS2019                                  | Papaconstantinou, et al., 2005              |
| Heart                                          | 3-12 mo     | GDS40                                    | NA                                          |
| Lung                                           | 2-26 mo     | GDS2929                                  | Misra, et al., 2007                         |
| Neocortex                                      | 5-30 mo     | NA                                       | Lee, et al., 2000                           |
| Eye                                            | 2-24 mo     | GDS396 and<br>GDS397                     | Ida, et al., 2003                           |
| Cochlea                                        | 4-15 mo     | GDS2681                                  | Someya, et al., 2007                        |
| Hematopoietic stem cells                       | 2.5-23 mo   | GDS1803                                  | Rossi, et al., 2005                         |
| Myogenic progenitors                           | 8-23.5 mo   | GDS1079                                  | Beggs, et al., 2004                         |
| <b>Rat (<i>Rattus norvegicus</i>) datasets</b> |             |                                          |                                             |
| Hippocampus                                    | 5-25 mo     | GDS2639                                  | Rowe, et al., 2007                          |
| Stromal cells                                  | 3-15 mo     | GDS2231                                  | Akavia, et al., 2006                        |
| Spinal cord                                    | 6-30 mo     | GDS1280                                  | NA                                          |
| Oculomotor nucleus                             | 6-30 mo     | GDS1280                                  | NA                                          |
| Skeletal muscle                                | 6-30 mo     | GDS1279                                  | NA                                          |
| Extraocular muscle                             | 6-30 mo     | GDS1279                                  | NA                                          |
| Laryngeal muscle                               | 6-30 mo     | GDS1278                                  | McMullen and Andrade, 2006                  |
| Heart                                          | 3.5-21 mo   | GDS399                                   | Dobson, et al., 2003                        |
| CA1 hippocampi                                 | 3-24 mo     | GDS2315                                  | Burger, et al., 2007                        |
| CA1 hippocampi                                 | 4-24 mo     | GDS520                                   | Blalock, et al., 2003                       |
| Primary glia                                   | 3-24 mo     | NA                                       | NA                                          |

Notes: yrs = years; mo = months; NA = not available.

**Table S2: Genes differentially expressed with age that have been validated by direct methods**

| <b>Gene symbol</b> | <b>Up- or down-regulated</b> | <b>Organism</b> | <b>Method</b>                 | <b>Reference</b>              |
|--------------------|------------------------------|-----------------|-------------------------------|-------------------------------|
| <i>APOD</i>        | up                           | Mouse           | qRT-PCR                       | Ida, et al., 2003             |
| <i>C3</i>          | up                           | Human           | single radial immunodiffusion | Yonemasu, et al., 1978        |
| <i>CTSS</i>        | up                           | Mouse           | qRT-PCR                       | Ida, et al., 2003             |
| <i>CLU</i>         | up                           | Rat             | Northern blot                 | Bettuzzi, et al., 1994        |
| <i>C1QA</i>        | up                           | Mouse           | qRT-PCR                       | Sharman, et al., 2005         |
| <i>GFAP</i>        | up                           | Mouse           | qRT-PCR                       | Lee, et al., 2000             |
| <i>MGST1</i>       | up                           | Human           | qRT-PCR                       | Prall, et al., 2007           |
| <i>C1QB</i>        | up                           | Mouse           | qRT-PCR                       | Verbitsky, et al., 2004       |
| <i>C4A</i>         | up                           | Mouse           | qRT-PCR                       | Lee, et al., 2000             |
| <i>COL3A1</i>      | down                         | Mouse           | qRT-PCR                       | Misra, et al., 2007           |
| <i>COL1A1</i>      | down                         | Mouse           | qRT-PCR                       | Misra, et al., 2007           |
| <i>ATP5G3</i>      | down                         | Rat             | Northern blot                 | Ishihata and Katano, 2006     |
| <i>CALB1</i>       | down                         | Rat             | Northern blot                 | Iacopino and Christakos, 1990 |

Note: Organism refers to the organism in which the validation was carried out.

## References

- Akavia, U.D. et al. (2006) Transcriptional profiling of mesenchymal stromal cells from young and old rats in response to Dexamethasone, *BMC Genomics*, **7**, 95.
- Beggs, M.L. et al. (2004) Alterations in the TGFbeta signaling pathway in myogenic progenitors with age, *Aging Cell*, **3**, 353-361.
- Bettuzzi, S. et al. (1994) Gene relaxation and aging: changes in the abundance of rat ventral prostate SGP-2 (clusterin) and ornithine decarboxylase mRNAs, *FEBS Lett*, **348**, 255-258.
- Blalock, E.M. et al. (2003) Gene microarrays in hippocampal aging: statistical profiling identifies novel processes correlated with cognitive impairment, *J Neurosci*, **23**, 3807-3819.
- Burger, C. et al. (2007) Changes in transcription within the CA1 field of the hippocampus are associated with age-related spatial learning impairments, *Neurobiol Learn Mem*, **87**, 21-41.
- Dobson, J.G., Jr. et al. (2003) Molecular mechanisms of reduced beta-adrenergic signaling in the aged heart as revealed by genomic profiling, *Physiol Genomics*, **15**, 142-147.
- Edwards, M.G. et al. (2007) Gene expression profiling of aging reveals activation of a p53-mediated transcriptional program, *BMC Genomics*, **8**, 80.
- Godbout, J.P. et al. (2005) Exaggerated neuroinflammation and sickness behavior in aged mice following activation of the peripheral innate immune system, *Faseb J*, **19**, 1329-1331.
- Iacopino, A.M. and Christakos, S. (1990) Specific reduction of calcium-binding protein (28-kilodalton calbindin-D) gene expression in aging and neurodegenerative diseases, *Proc Natl Acad Sci U S A*, **87**, 4078-4082.
- Ida, H. et al. (2003) Age-related changes in the transcriptional profile of mouse RPE/choroid, *Physiol Genomics*, **15**, 258-262.
- Ishihata, A. and Katano, Y. (2006) Investigation of differentially expressed genes in the ventricular myocardium of senescent rats, *Ann N Y Acad Sci*, **1067**, 142-151.
- Lee, C.K. et al. (2000) Gene-expression profile of the ageing brain in mice, *Nat Genet*, **25**, 294-297.
- Lu, T. et al. (2004) Gene regulation and DNA damage in the ageing human brain, *Nature*, **429**, 883-891.
- McMullen, C.A. and Andrade, F.H. (2006) Contractile dysfunction and altered metabolic profile of the aging rat thyroarytenoid muscle, *J Appl Physiol*, **100**, 602-608.
- Misra, V. et al. (2007) Global expression profiles from C57BL/6J and DBA/2J mouse lungs to determine aging-related genes, *Physiol Genomics*, **31**, 429-440.
- Papaconstantinou, J. et al. (2005) Hepatic gene and protein expression of primary components of the IGF-I axis in long lived Snell dwarf mice, *Mech Ageing Dev*, **126**, 692-704.
- Prall, W.C. et al. (2007) Age-related transcription levels of KU70, MGST1 and BIK in CD34+ hematopoietic stem and progenitor cells, *Mech Ageing Dev*, **128**, 503-510.
- Rodwell, G.E. et al. (2004) A transcriptional profile of aging in the human kidney, *PLoS Biol*, **2**, e427.
- Rossi, D.J. et al. (2005) Cell intrinsic alterations underlie hematopoietic stem cell aging, *Proc Natl Acad Sci U S A*, **102**, 9194-9199.
- Rowe, W.B. et al. (2007) Hippocampal expression analyses reveal selective association of immediate-early, neuroenergetic, and myelinogenic pathways with cognitive impairment in aged rats, *J Neurosci*, **27**, 3098-3110.
- Sharman, E.H. et al. (2005) Parallel changes in gene expression in aged human and mouse cortex, *Neurosci Lett*, **390**, 4-8.
- Someya, S. et al. (2007) Caloric restriction suppresses apoptotic cell death in the mammalian cochlea and leads to prevention of presbycusis, *Neurobiol Aging*, **28**, 1613-1622.
- Verbitsky, M. et al. (2004) Altered hippocampal transcript profile accompanies an age-related spatial memory deficit in mice, *Learn Mem*, **11**, 253-260.

- Welle, S. et al. (2004) Skeletal muscle gene expression profiles in 20-29 year old and 65-71 year old women, *Exp Gerontol*, **39**, 369-377.
- Welle, S. et al. (2003) Gene expression profile of aging in human muscle, *Physiol Genomics*, **14**, 149-159.
- Welle, S. et al. (2002) Computational method for reducing variance with Affymetrix microarrays, *BMC Bioinformatics*, **3**, 23.
- Yonemasu, K. et al. (1978) Effect of age on C1q and C3 levels in human serum and their presence in colostrum, *Immunology*, **35**, 523-530.
